# Supplementary material
Source: publisher figshare collection journal article supplement (https://acs.figshare.com/ndownloader/files/3788407)
Supplement: Supplementary file 1 [file 3788407]

## Supporting Information

### Electrostatic Stabilized InP Colloidal Quantum Dots with High Photoluminescence

#### Efficiency

Anush N. Mnayan,<sup>†</sup> Artavazd Gh. Kirakosyan,<sup>†</sup> Hyunki Kim,<sup>†</sup> Ho Seong Jang,<sup>‡</sup> and Duk Young Jeon\*,<sup>†</sup>

<sup>†</sup>Department of Materials Science and Engineering, Korea Advanced Institute of Science and Technology (KAIST), Yuseong-gu, Daejeon 305-701, Korea

<sup>‡</sup>Korea Institute of Science and Technology, Seongbuk-gu, Seoul 136-791, Korea

**Figure S1. pH dependence of solution from the acid content**

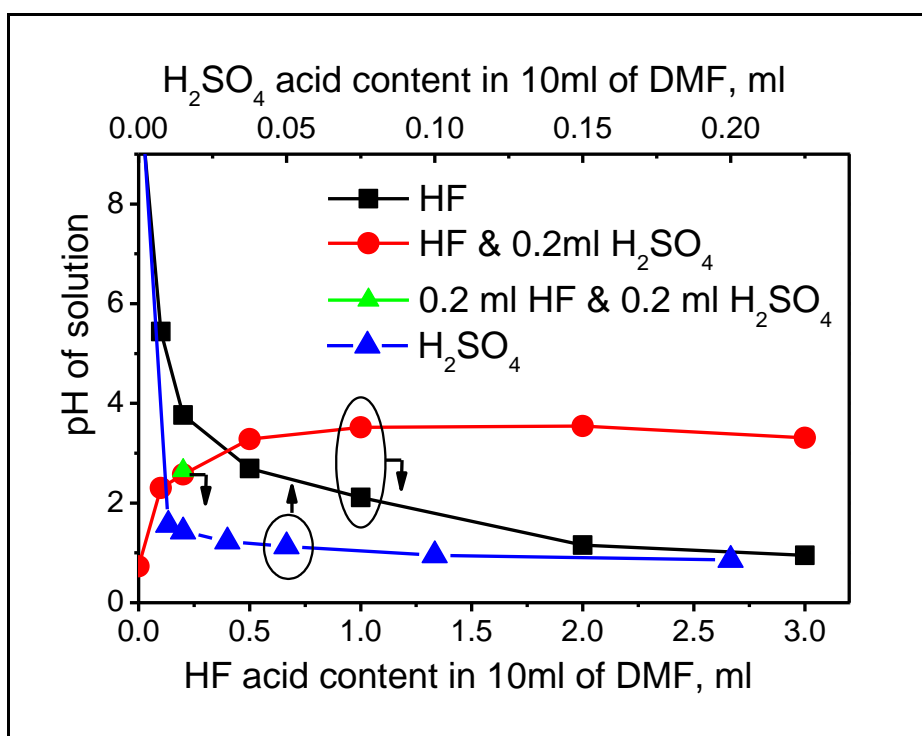

The pH value corresponds to the ions concentration in acid/DMF solution according to the following acid dissociation schema  $[HAn] \rightleftharpoons [H^+] + [An^-]$  with given  $K_{eq}$ . The pH of anhydrous DMF is measured to be over 10, indicating a low content of  $H^+$  ions. However, the addition of 0.2 mL  $H_2SO_4$  into 10mL of DMF reduces down the pH value of the solution to 0.85. A similar tendency is observed in the HF/DMF solution: the pH is changed from 10 to ~1 while the content

of HF in 10 ml of DMF is increased up to 3 ml. However, the addition of a second acid (HF) into the H<sub>2</sub>SO<sub>4</sub>/DMF does not lead to a cumulative phenomenon, particularly in the presence of 0.2 ml of H<sub>2</sub>SO<sub>4</sub> in 10 ml of DMF: the pH value of the solution increases from 0.85 to 3.5 when 3ml of HF is added. For instance, the HF/H<sub>2</sub>SO<sub>4</sub>/DMF solution with a 0.2/0.2/10 ml ratio exhibits an increased pH value of 2.6 rather than a reduced value.

**Table S1. Effect of pH on InP QD stability.**

| #                                   | 1    | 2    | 3    |
|-------------------------------------|------|------|------|
| DMF, ml                             | 10   | 10   | 10   |
| HF, ml                              | 0.2  | -    | -    |
| H <sub>2</sub> SO <sub>4</sub> , ml | 0.2  | 0.05 | 0.01 |
| QD in octane,<br>ml at 10mg/ml      | 6.0  | 6.0  | 6.0  |
| pH                                  | 2.65 | 1.13 | 1.56 |

The series of photo images of samples show the degradation characteristics as a function of the acid solution content. As can be seen from the Figure S2, sample #3 with 0.01 ml of H<sub>2</sub>SO<sub>4</sub> shows high acidity (pH = 1.56) and fast degradation within 60min. However, sample #1, which has higher HF (0.2 ml) and H<sub>2</sub>SO<sub>4</sub> (0.2 ml) content, shows low acidity (pH = 2.65) and much slower degradation compared to samples #2, 3.

**Figure S2. The photo images of samples showing the degradation as a function of the acid solution content**

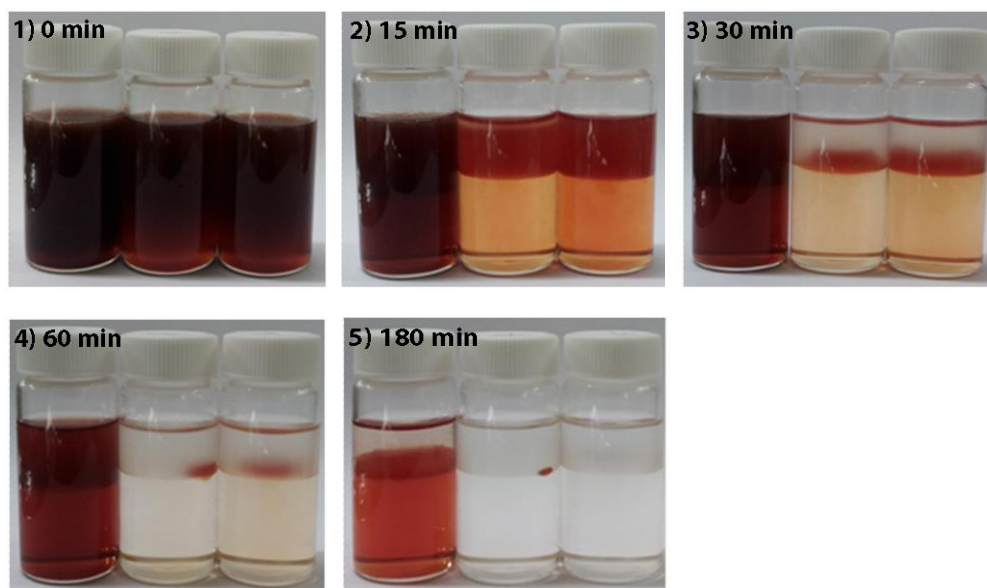

**Table S2. Atomic contents of elements obtained from XPS expressed by %**

| Element | InP   | InP-F | InP-FS |
|---------|-------|-------|--------|
| C1s     | 52.42 | 47.41 | 35.06  |
| In3d5   | 2.92  | 5.70  | 13.54  |
| N1s     | 2.91  | 2.55  | 8.78   |
| O1s     | 37.26 | 34.30 | 22.17  |
| P2p     | 4.49  | 6.17  | 7.66   |
| F1s     | -     | 3.87  | 4.20   |
| S2p     | -     | -     | 8.59   |

**Table S3. PL decay parameters of InP-Pr, HF-etched InP-HF, and our InP-FS QD solutions**

| Material | $\tau_1, ns$ | $f_1$ | $\tau_2, ns$ | $f_2$ | $\tau_3, ns$ | $f_3$ | $\chi^2$ | $\tau_{avg}, ns$ |
|----------|--------------|-------|--------------|-------|--------------|-------|----------|------------------|
|----------|--------------|-------|--------------|-------|--------------|-------|----------|------------------|

|                 |      |        |      |        |      |        |       |             |
|-----------------|------|--------|------|--------|------|--------|-------|-------------|
| InP-Pr          | 3.6  | 23.11% | 16.2 | 34.4%  | 84.3 | 42.5%  | 1.159 | <b>42.2</b> |
| InP-HF<br>etch. | 8.9  | 26.7%  | 34.2 | 52.19% | 149  | 21.14% | 1.127 | <b>51.7</b> |
| InP-FS          | 12.1 | 13.6%  | 44.2 | 54.7%  | 156  | 31.8%  | 1.029 | <b>75.5</b> |
